# Supplementary material for: Simultaneous determination of 27 pesticides in corn and cow matrices by ultra-performance liquid chromatography-tandem mass spectrometry
Source: Royal Society of Chemistry journal article supplement (doi:10.1039/d3ay01473h), 2023-01-01
Supplement: d3ay01473h1.pdf [file d3ay01473h1.pdf]

## Supplementary file

### Simultaneous determination of 27 pesticides in corn and cow matrices by ultra-performance liquid chromatography-tandem mass spectrometry

Fengjiao Hao<sup>a</sup>, Yuanyuan Luo<sup>b</sup>, Fengshou Dong<sup>a</sup>, Xinglu Pan<sup>a</sup>, Xiaohu Wu<sup>a</sup>,

Yongquan Zheng<sup>a</sup>, Jun Xu<sup>a\*</sup>

<sup>a</sup>State Key Laboratory for Biology of Plant Diseases and Insect Pests, Institute of Plant Protection, Chinese Academy of Agricultural Sciences, No. 2 West Yuanmingyuan Road, Haidian District, Beijing 100193, People's Republic of China; <sup>b</sup>Ministry of Agriculture and Rural Affairs of the People's Republic of China, Institute for the Control of Agrochemicals

\*Author for correspondence: junxu1@ippcaas.cn, Tel: 010-62815938

### **Caption of tables**

**Table S1.** Precision, and accuracy of target compounds in corn and fresh corn.

**Table S2.** Precision, and accuracy of target compounds in fresh corn stover and old corn stover.

**Table S3.** Precision, and accuracy of target compounds in corn silage and beef.

**Table S4.** Precision, and accuracy of target compounds in fat and milk fat.

**Table S5.** Precision, and accuracy of target compounds in Liver and Kidney.

**Table S6.** Precision, and accuracy of target compounds in milk and cow stomach.

**Table S7.** Analysis of variance (ANOVA) was used to evaluate the linearity of the compounds in corn, fresh corn, fresh corn stover substrates and old corn stove

**Table S8.** Analysis of variance (ANOVA) was used to evaluate the linearity of the compounds in corn silage, beef, fat and milk fat

**Table S9.** Analysis of variance (ANOVA) was used to evaluate the linearity of the compounds in liver, kidney, milk and cow stomach

**Fig. S1** MS chromatogram of 27 standard pesticides at low levels.

**Table S1.** Precision, and accuracy of target compounds in corn and fresh corn

| Pesticide           | Corn                 |       |       |                      |      |     |                      |      |      | Fresh corn           |       |       |                      |     |     |                      |      |      |
|---------------------|----------------------|-------|-------|----------------------|------|-----|----------------------|------|------|----------------------|-------|-------|----------------------|-----|-----|----------------------|------|------|
|                     | spiked level (mg/kg) |       |       |                      |      |     |                      |      |      | spiked level (mg/kg) |       |       |                      |     |     |                      |      |      |
|                     | Recovery (%)         |       |       | RSD <sub>r</sub> (%) |      |     | RSD <sub>R</sub> (%) |      |      | Recovery (%)         |       |       | RSD <sub>r</sub> (%) |     |     | RSD <sub>R</sub> (%) |      |      |
|                     | 0.01/<br>0.02        | 0.1   | 1     | 0.01/<br>0.02        | 0.1  | 1   | 0.01/<br>0.02        | 0.1  | 1    | 0.01/<br>0.02        | 0.1   | 1     | 0.01/<br>0.02        | 0.1 | 1   | 0.01/<br>0.02        | 0.1  | 1    |
| Cyhalothrin         | 99.5                 | 79.7  | 84.4  | 2.2                  | 7.4  | 9.2 | 9.5                  | 5.8  | 4.2  | 104.2                | 84.3  | 90.5  | 14.9                 | 5.1 | 5.9 | 15.0                 | 9.9  | 6.7  |
| Imidacloprid        | 75.7                 | 81.3  | 87.1  | 9.6                  | 12.7 | 4.8 | 11.0                 | 10.8 | 1.9  | 86.3                 | 92.0  | 84.8  | 11.6                 | 4.1 | 2.8 | 1.2                  | 2.5  | 5.0  |
| Beta cypermethrin   | 65.2                 | 75.0  | 75.8  | 12.3                 | 10.0 | 9.1 | 2.7                  | 2.4  | 7.6  | 117.6                | 116.3 | 108.3 | 8.4                  | 5.7 | 8.2 | 10.3                 | 6.2  | 2.3  |
| Chlorpyrifos        | 84.5                 | 75.2  | 76.9  | 8.2                  | 5.9  | 5.4 | 3.5                  | 7.9  | 4.8  | 109.5                | 96.0  | 91.2  | 4.9                  | 4.3 | 4.2 | 8.7                  | 2.8  | 1.6  |
| Chlorantraniliprole | 116.6                | 110.1 | 105.6 | 4.2                  | 10.3 | 7.2 | 16.4                 | 1.8  | 15.3 | 95.7                 | 73.1  | 83.7  | 18.5                 | 6.0 | 2.4 | 6.1                  | 2.9  | 3.7  |
| Cyantraniliprole    | 66.2                 | 74.4  | 76.8  | 14.2                 | 6.8  | 7.4 | 19.5                 | 3.1  | 6.8  | 90.7                 | 91.0  | 94.3  | 17.7                 | 9.8 | 3.4 | 2.1                  | 4.4  | 6.0  |
| Thiamethoxam        | 103.0                | 84.0  | 87.7  | 5.3                  | 8.8  | 5.0 | 15.4                 | 4.2  | 3.0  | 96.2                 | 90.5  | 87.7  | 7.1                  | 3.8 | 0.9 | 2.7                  | 7.5  | 6.9  |
| Carbaryl            | 79.3                 | 86.6  | 96.6  | 6.2                  | 10.5 | 5.6 | 6.2                  | 2.0  | 5.4  | 78.9                 | 83.1  | 87.4  | 7.6                  | 3.8 | 2.5 | 10.4                 | 2.5  | 1.6  |
| Emamectin benzoate  | 71.3                 | 71.4  | 81.7  | 9.1                  | 5.2  | 3.1 | 7.6                  | 5.1  | 2.0  | 63.1                 | 82.4  | 103.8 | 5.9                  | 7.4 | 4.9 | 4.7                  | 1.8  | 7.7  |
| Indoxacarb          | 92.2                 | 85.5  | 80.0  | 11.6                 | 6.5  | 7.7 | 3.2                  | 1.6  | 2.5  | 92.6                 | 83.3  | 93.7  | 12.2                 | 4.6 | 9.8 | 7.0                  | 8.1  | 5.1  |
| Acetamiprid         | 81.0                 | 70.0  | 70.7  | 5.6                  | 14.7 | 3.6 | 2.6                  | 12.7 | 8.9  | 83.5                 | 81.6  | 83.9  | 7.0                  | 6.0 | 8.2 | 7.3                  | 1.0  | 6.6  |
| Lufenuron           | 66.1                 | 70.8  | 71.9  | 10.6                 | 3.3  | 3.8 | 15.5                 | 7.1  | 1.1  | 108.0                | 100.5 | 75.8  | 4.3                  | 5.4 | 2.8 | 0.4                  | 7.7  | 4.8  |
| Dinotefuran         | 81.1                 | 87.9  | 83.7  | 5.9                  | 8.0  | 3.3 | 11.2                 | 2.1  | 2.2  | 104.5                | 87.1  | 88.1  | 10.4                 | 2.4 | 7.8 | 13.1                 | 1.3  | 5.5  |
| Tebuconazole        | 112.5                | 99.1  | 101.4 | 13.0                 | 8.1  | 2.3 | 15.2                 | 4.3  | 1.1  | 70.1                 | 71.0  | 96.4  | 17.7                 | 5.5 | 9.1 | 6.9                  | 7.2  | 1.9  |
| Azoxystrobin        | 105.5                | 94.6  | 87.5  | 2.5                  | 10.9 | 5.2 | 14.4                 | 6.1  | 5.0  | 80.8                 | 71.1  | 75.6  | 3.8                  | 2.8 | 7.9 | 2.6                  | 8.4  | 11.2 |
| Propiconazole       | 89.1                 | 81.7  | 87.1  | 2.5                  | 9.4  | 3.4 | 5.2                  | 2.1  | 6.6  | 75.4                 | 75.9  | 86.8  | 5.0                  | 2.0 | 8.9 | 10.1                 | 9.9  | 4.6  |
| Triadimefon         | 110.5                | 88.4  | 85.3  | 8.4                  | 4.2  | 4.7 | 8.9                  | 1.8  | 2.7  | 100.9                | 84.2  | 83.8  | 8.4                  | 2.2 | 8.8 | 10.0                 | 4.1  | 6.8  |
| Trifloxystrobin     | 97.5                 | 98.2  | 96.8  | 3.0                  | 9.4  | 2.0 | 12.4                 | 14.7 | 10.3 | 77.4                 | 73.6  | 74.6  | 7.1                  | 1.8 | 7.3 | 9.7                  | 13.9 | 17.0 |
| Epoxiconazole       | 96.2                 | 87.1  | 82.4  | 3.2                  | 9.9  | 4.5 | 5.8                  | 0.3  | 2.2  | 83.8                 | 74.8  | 82.3  | 3.4                  | 3.4 | 8.1 | 0.4                  | 9.7  | 7.2  |

|                |       |       |       |      |      |      |      |      |      |       |      |      |      |      |     |      |      |      |
|----------------|-------|-------|-------|------|------|------|------|------|------|-------|------|------|------|------|-----|------|------|------|
| Pyraclostrobin | 108.5 | 99.0  | 91.9  | 3.1  | 9.8  | 5.5  | 1.7  | 13.5 | 10.3 | 70.6  | 70.7 | 73.1 | 10.3 | 3.1  | 8.2 | 13.3 | 13.1 | 14.6 |
| Difenoconazole | 96.8  | 97.9  | 103.9 | 8.4  | 5.1  | 8.0  | 3.0  | 8.9  | 8.2  | 80.5  | 72.9 | 74.2 | 5.7  | 4.0  | 8.2 | 14.5 | 2.3  | 7.9  |
| Metalaxyl-M    | 100.8 | 103.0 | 101.4 | 8.7  | 8.8  | 6.3  | 6.3  | 10.9 | 10.3 | 82.1  | 70.4 | 71.1 | 3.8  | 3.3  | 1.7 | 4.4  | 12.0 | 14.3 |
| Carbendazim    | 75.7  | 74.9  | 77.8  | 3.4  | 7.1  | 5.5  | 5.1  | 5.4  | 3.4  | 76.9  | 75.1 | 75.9 | 7.4  | 1.7  | 6.7 | 2.4  | 3.6  | 6.7  |
| Atrazine       | 86.4  | 81.8  | 84.7  | 3.6  | 8.5  | 8.3  | 1.6  | 2.4  | 0.2  | 85.2  | 82.4 | 83.6 | 5.1  | 1.0  | 8.0 | 5.5  | 3.4  | 6.8  |
| Acetochlor     | 112.5 | 78.4  | 89.3  | 10.7 | 11.9 | 8.2  | 14.0 | 6.2  | 4.8  | 114.5 | 90.2 | 91.3 | 4.0  | 5.3  | 3.2 | 15.9 | 4.3  | 2.5  |
| Clothianidin   | 78.2  | 74.8  | 74.4  | 18.4 | 18.9 | 8.2  | 13.6 | 5.0  | 12.7 | 102.7 | 77.1 | 99.0 | 14.4 | 11.0 | 7.3 | 11.8 | 9.3  | 2.7  |
| Fludioxonil    | 84.1  | 77.3  | 81.0  | 3.6  | 12.0 | 11.5 | 0.2  | 8.7  | 6.9  | 84.5  | 82.9 | 76.3 | 7.1  | 4.0  | 8.6 | 0.3  | 4.2  | 11.6 |

**Table S2.** Precision, and accuracy of target compounds in fresh corn stover and old corn stover

| Pesticide           | Fresh corn stover    |       |               |                      |      |               |                      |      |               | Old corn stover      |      |               |                      |      |               |                      |     |      |
|---------------------|----------------------|-------|---------------|----------------------|------|---------------|----------------------|------|---------------|----------------------|------|---------------|----------------------|------|---------------|----------------------|-----|------|
|                     | spiked level (mg/kg) |       |               |                      |      |               |                      |      |               | spiked level (mg/kg) |      |               |                      |      |               |                      |     |      |
|                     | Recovery (%)         |       |               | RSD <sub>r</sub> (%) |      |               | RSD <sub>R</sub> (%) |      |               | Recovery (%)         |      |               | RSD <sub>r</sub> (%) |      |               | RSD <sub>R</sub> (%) |     |      |
| 0.01/<br>0.02       | 0.1                  | 1     | 0.01/<br>0.02 | 0.1                  | 1    | 0.01/<br>0.02 | 0.1                  | 1    | 0.01/<br>0.02 | 0.1                  | 1    | 0.01/<br>0.02 | 0.1                  | 1    | 0.01/<br>0.02 | 0.1                  | 1   |      |
| Cyhalothrin         | 92.8                 | 89.0  | 91.4          | 5.5                  | 5.6  | 4.0           | 11.6                 | 10.9 | 2.2           | 105.1                | 88.6 | 76.7          | 10.8                 | 11.7 | 3.6           | 4.2                  | 6.1 | 5.5  |
| Imidacloprid        | 102.3                | 84.1  | 85.3          | 18.6                 | 5.3  | 1.7           | 9.2                  | 9.1  | 4.6           | 101.9                | 90.5 | 86.0          | 18.8                 | 6.7  | 5.2           | 10.0                 | 1.9 | 1.0  |
| Beta cypermethrin   | 110.3                | 101.0 | 103.5         | 8.4                  | 10.3 | 3.5           | 6.4                  | 7.9  | 11.9          | 82.9                 | 88.1 | 83.7          | 5.9                  | 6.3  | 2.5           | 16.0                 | 8.3 | 3.4  |
| Chlorpyrifos        | 66.9                 | 87.6  | 77.2          | 3.8                  | 2.2  | 4.2           | 8.9                  | 3.1  | 3.7           | 77.2                 | 85.8 | 72.8          | 4.6                  | 2.0  | 3.4           | 4.5                  | 5.1 | 2.0  |
| Chlorantraniliprole | 92.2                 | 93.5  | 82.1          | 12.5                 | 5.4  | 1.9           | 1.0                  | 6.1  | 1.0           | 92.3                 | 83.2 | 80.0          | 19.9                 | 4.8  | 3.1           | 17.7                 | 0.5 | 3.8  |
| Cyantraniliprole    | 83.6                 | 90.7  | 86.9          | 11.4                 | 3.1  | 2.4           | 10.6                 | 7.0  | 2.1           | 66.6                 | 77.7 | 84.2          | 8.0                  | 3.6  | 4.3           | 0.67                 | 4.6 | 3.8  |
| Thiamethoxam        | 93.4                 | 94.6  | 89.7          | 4.3                  | 2.7  | 1.3           | 6.1                  | 0.8  | 5.3           | 91.5                 | 87.6 | 83.1          | 8.1                  | 4.6  | 4.2           | 2.6                  | 3.2 | 0.9  |
| Carbaryl            | 91.6                 | 106.6 | 96.3          | 6.6                  | 3.0  | 1.9           | 3.0                  | 6.7  | 1.6           | 80.7                 | 88.2 | 85.8          | 7.7                  | 2.7  | 2.9           | 5.1                  | 0.5 | 2.9  |
| Emamectin benzoate  | 96.3                 | 89.2  | 85.6          | 5.2                  | 2.8  | 3.2           | 6.3                  | 3.6  | 3.8           | 68.6                 | 81.8 | 75.9          | 8.9                  | 2.4  | 3.8           | 14.2                 | 1.5 | 7.6  |
| Indoxacarb          | 106.6                | 91.9  | 70.4          | 14.0                 | 3.6  | 3.3           | 7.2                  | 3.8  | 0.5           | 93.9                 | 88.9 | 101.8         | 9.5                  | 3.9  | 0.9           | 3.2                  | 2.1 | 14.7 |

|                 |       |       |       |      |      |     |      |     |      |       |       |      |      |      |     |      |     |      |
|-----------------|-------|-------|-------|------|------|-----|------|-----|------|-------|-------|------|------|------|-----|------|-----|------|
| Acetamiprid     | 89.3  | 90.5  | 100.1 | 7.9  | 4.3  | 1.2 | 7.1  | 4.4 | 0.1  | 91.5  | 103.0 | 97.9 | 8.9  | 2.0  | 3.1 | 3.6  | 7.1 | 18.9 |
| Lufenuron       | 117.3 | 100.4 | 72.3  | 8.9  | 4.0  | 5.3 | 8.0  | 0.5 | 1.7  | 103.3 | 95.0  | 74.5 | 12.7 | 7.7  | 6.4 | 15.6 | 5.2 | 0.3  |
| Dinotefuran     | 79.4  | 81.1  | 83.1  | 4.4  | 2.5  | 4.5 | 3.9  | 4.1 | 9.8  | 82.4  | 80.3  | 70.3 | 6.2  | 3.9  | 0.4 | 7.8  | 2.1 | 1.2  |
| Tebuconazole    | 80.6  | 71.9  | 92.5  | 8.1  | 12.0 | 3.5 | 3.5  | 6.2 | 16.5 | 80.0  | 70.4  | 92.3 | 9.0  | 6.1  | 4.0 | 7.2  | 7.9 | 14.6 |
| Azoxystrobin    | 95.6  | 101.0 | 86.7  | 2.6  | 4.3  | 3.3 | 5.9  | 5.8 | 12.5 | 78.3  | 83.0  | 91.2 | 9.4  | 1.1  | 1.7 | 12.1 | 0.4 | 13.6 |
| Propiconazole   | 82.9  | 84.5  | 87.8  | 2.3  | 2.8  | 2.8 | 5.7  | 5.3 | 12.0 | 74.1  | 85.6  | 92.7 | 7.9  | 1.6  | 1.6 | 8.8  | 1.6 | 14.8 |
| Triadimefon     | 82.0  | 86.6  | 103.7 | 4.8  | 4.6  | 1.4 | 3.3  | 3.4 | 1.8  | 98.8  | 89.6  | 73.0 | 4.6  | 2.0  | 2.5 | 8.2  | 6.6 | 0.4  |
| Trifloxystrobin | 85.9  | 89.1  | 76.5  | 3.9  | 2.5  | 3.8 | 1.6  | 6.4 | 4.3  | 76.1  | 80.4  | 99.5 | 5.3  | 2.3  | 1.8 | 10.7 | 2.6 | 17.2 |
| Epoxiconazole   | 76.3  | 80.1  | 78.4  | 4.8  | 5.9  | 2.4 | 5.6  | 7.3 | 5.7  | 71.7  | 82.2  | 89.0 | 3.3  | 2.0  | 3.7 | 10.5 | 3.4 | 13.8 |
| Pyraclostrobin  | 81.0  | 89.2  | 75.0  | 6.5  | 3.3  | 3.6 | 2.6  | 3.1 | 1.2  | 81.5  | 82.9  | 94.4 | 7.4  | 3.5  | 1.9 | 12.2 | 2.8 | 18.2 |
| Difenoconazole  | 80.8  | 90.7  | 70.6  | 7.3  | 7.5  | 3.5 | 4.9  | 3.6 | 6.9  | 72.7  | 83.5  | 77.2 | 10.5 | 5.3  | 4.8 | 11.3 | 5.2 | 2.1  |
| Metalaxyl-M     | 95.8  | 102.2 | 95.3  | 7.8  | 2.1  | 1.1 | 4.5  | 3.2 | 1.7  | 83.9  | 87.9  | 90.4 | 5.9  | 2.0  | 2.3 | 8.3  | 4.6 | 5.0  |
| Carbendazim     | 75.0  | 79.3  | 73.6  | 2.5  | 1.1  | 4.6 | 0.4  | 2.5 | 0.7  | 70.5  | 73.6  | 74.0 | 3.8  | 2.8  | 5.5 | 9.5  | 2.5 | 1.3  |
| Atrazine        | 94.4  | 103.5 | 86.8  | 2.3  | 2.5  | 5.4 | 5.6  | 4.8 | 4.8  | 82.3  | 90.0  | 87.2 | 3.4  | 2.9  | 4.4 | 7.7  | 2.5 | 3.5  |
| Acetochlor      | 82.7  | 91.8  | 84.2  | 10.5 | 3.7  | 2.4 | 15.9 | 2.0 | 1.3  | 74.7  | 80.5  | 77.6 | 8.3  | 11.1 | 3.6 | 5.7  | 4.5 | 2.0  |
| Clothianidin    | 69.3  | 84.1  | 85.2  | 16.9 | 16.4 | 7.4 | 9.18 | 9.8 | 0.8  | 101.9 | 92.7  | 82.1 | 13.3 | 12.8 | 4.7 | 2.3  | 4.0 | 1.4  |
| Fludioxonil     | 75.8  | 97.2  | 87.0  | 5.5  | 5.5  | 4.1 | 1.6  | 2.7 | 4.2  | 83.8  | 84.6  | 83.6 | 3.4  | 2.5  | 3.5 | 2.9  | 3.6 | 2.9  |

**Table S3.** Precision, and accuracy of target compounds in corn silage and beef

| Pesticide     | Corn silage          |       |               |                      |     |               |                      |      |               | Beef                 |      |               |                      |      |               |                      |      |     |
|---------------|----------------------|-------|---------------|----------------------|-----|---------------|----------------------|------|---------------|----------------------|------|---------------|----------------------|------|---------------|----------------------|------|-----|
|               | spiked level (mg/kg) |       |               |                      |     |               |                      |      |               | spiked level (mg/kg) |      |               |                      |      |               |                      |      |     |
|               | Recovery (%)         |       |               | RSD <sub>t</sub> (%) |     |               | RSD <sub>R</sub> (%) |      |               | Recovery (%)         |      |               | RSD <sub>t</sub> (%) |      |               | RSD <sub>R</sub> (%) |      |     |
| 0.01/<br>0.02 | 0.1                  | 1     | 0.01/<br>0.02 | 0.1                  | 1   | 0.01/<br>0.02 | 0.1                  | 1    | 0.01/<br>0.02 | 0.1                  | 1    | 0.01/<br>0.02 | 0.1                  | 1    | 0.01/<br>0.02 | 0.1                  | 1    |     |
| Cyhalothrin   | 100.0                | 115.1 | 109.1         | 10.9                 | 8.9 | 2.8           | 8.3                  | 11.8 | 10.3          | 102.4                | 94.6 | 94.2          | 9.9                  | 10.5 | 6.2           | 5.9                  | 10.4 | 5.6 |

|                     |       |       |       |      |      |      |      |      |      |       |       |       |      |      |     |      |      |     |
|---------------------|-------|-------|-------|------|------|------|------|------|------|-------|-------|-------|------|------|-----|------|------|-----|
| Imidacloprid        | 90.9  | 91.5  | 85.1  | 11.7 | 4.0  | 4.9  | 1.4  | 4.5  | 1.8  | 85.2  | 99.7  | 98.7  | 7.1  | 2.2  | 3.0 | 9.4  | 0.4  | 4.8 |
| Beta cypermethrin   | 113.1 | 109.0 | 108.9 | 6.9  | 10.8 | 2.7  | 10.2 | 6.2  | 10.3 | 98.7  | 94.3  | 94.0  | 15.3 | 5.9  | 4.0 | 0.1  | 4.9  | 2.4 |
| Chlorpyrifos        | 86.9  | 97.0  | 89.1  | 5.0  | 4.8  | 4.0  | 4.1  | 4.6  | 9.1  | 92.2  | 93.5  | 92.7  | 7.4  | 5.8  | 1.9 | 0.59 | 9.25 | 0.8 |
| Chlorantraniliprole | 91.8  | 98.3  | 78.1  | 15.7 | 3.9  | 6.1  | 2.9  | 5.8  | 2.8  | 103.6 | 90.1  | 96.0  | 6.6  | 2.0  | 4.5 | 1.5  | 6.1  | 2.2 |
| Cyantraniliprole    | 100.7 | 83.8  | 78.2  | 6.1  | 8.9  | 6.7  | 3.1  | 5.2  | 3.5  | 98.3  | 92.0  | 99.0  | 10.3 | 2.8  | 4.4 | 3.7  | 3.8  | 3.1 |
| Thiamethoxam        | 95.0  | 96.1  | 92.5  | 9.0  | 4.4  | 5.4  | 8.8  | 2.9  | 1.1  | 82.1  | 95.7  | 102.5 | 9.5  | 1.6  | 3.4 | 11.6 | 0.4  | 4.8 |
| Carbaryl            | 100.7 | 93.3  | 81.5  | 4.8  | 3.1  | 7.8  | 2.3  | 5.5  | 2.3  | 99.4  | 99.0  | 98.8  | 7.3  | 3.6  | 5.7 | 9.2  | 1.6  | 4.6 |
| Emamectin benzoate  | 103.3 | 76.2  | 74.7  | 13.7 | 4.8  | 5.9  | 9.2  | 0.5  | 0.9  | 70.2  | 73.5  | 71.5  | 10.4 | 5.7  | 3.5 | 18.4 | 7.2  | 3.8 |
| Indoxacarb          | 109.2 | 118.2 | 91.6  | 7.0  | 1.5  | 10.7 | 7.0  | 8.8  | 14.5 | 104.4 | 91.5  | 95.6  | 10.8 | 2.0  | 2.6 | 7.3  | 4.2  | 5.2 |
| Acetamiprid         | 80.4  | 96.9  | 73.2  | 9.7  | 6.1  | 6.4  | 14.6 | 2.9  | 10.2 | 86.0  | 92.6  | 91.1  | 8.0  | 3.8  | 6.7 | 9.2  | 14.8 | 1.4 |
| Lufenuron           | 95.8  | 113.1 | 87.4  | 15.2 | 7.1  | 2.1  | 16.1 | 17.8 | 3.3  | 100.4 | 98.6  | 98.5  | 18.2 | 4.3  | 2.7 | 2.7  | 9.7  | 6.1 |
| Dinotefuran         | 88.4  | 85.3  | 72.7  | 3.6  | 2.1  | 4.0  | 4.2  | 1.0  | 2.1  | 76.2  | 90.3  | 90.9  | 17.9 | 5.6  | 3.1 | 13.0 | 5.7  | 1.9 |
| Tebuconazole        | 68.0  | 93.6  | 74.8  | 5.3  | 9.7  | 7.7  | 12.5 | 7.7  | 3.6  | 87.2  | 93.3  | 96.3  | 14.4 | 4.7  | 3.8 | 17.6 | 2.6  | 2.7 |
| Azoxystrobin        | 89.2  | 95.7  | 92.7  | 5.5  | 7.1  | 2.8  | 2.0  | 3.2  | 12.2 | 108.3 | 101.3 | 99.9  | 5.1  | 1.6  | 3.3 | 2.4  | 2.2  | 2.2 |
| Propiconazole       | 91.4  | 91.5  | 71.6  | 1.3  | 4.9  | 6.2  | 4.2  | 2.2  | 1.1  | 95.0  | 87.6  | 95.0  | 4.8  | 0.5  | 1.6 | 5.6  | 3.9  | 2.7 |
| Triadimefon         | 73.6  | 87.7  | 70.0  | 5.0  | 7.3  | 2.0  | 8.9  | 5.3  | 0.4  | 97.2  | 96.3  | 98.9  | 7.0  | 3.3  | 2.1 | 5.2  | 3.7  | 2.1 |
| Trifloxystrobin     | 106.6 | 106.2 | 80.3  | 2.7  | 5.6  | 9.6  | 7.2  | 6.2  | 7.2  | 95.2  | 90.3  | 97.7  | 2.9  | 1.8  | 2.5 | 2.9  | 0.3  | 4.4 |
| Epoxiconazole       | 86.9  | 91.9  | 74.1  | 3.6  | 3.0  | 2.9  | 1.9  | 1.1  | 2.3  | 94.7  | 92.6  | 98.7  | 2.3  | 1.5  | 2.6 | 7.6  | 1.3  | 4.0 |
| Pyraclostrobin      | 103.9 | 116.7 | 84.9  | 3.3  | 4.0  | 10.8 | 5.7  | 15.1 | 9.4  | 97.6  | 84.8  | 97.4  | 3.6  | 2.9  | 0.5 | 12.9 | 2.5  | 2.2 |
| Difenoconazole      | 92.5  | 97.0  | 86.9  | 11.5 | 6.1  | 3.3  | 9.5  | 2.5  | 5.1  | 97.4  | 89.4  | 91.2  | 10.8 | 6.8  | 2.9 | 6.8  | 1.6  | 1.5 |
| Metalaxyl-M         | 106.7 | 98.9  | 82.5  | 6.6  | 6.1  | 8.6  | 8.2  | 1.5  | 3.5  | 93.3  | 93.6  | 97.6  | 6.5  | 1.2  | 2.4 | 4.2  | 1.3  | 4.5 |
| Carbendazim         | 74.6  | 75.9  | 71.8  | 2.9  | 2.2  | 5.2  | 2.2  | 1.1  | 0.8  | 91.1  | 86.7  | 89.0  | 2.8  | 5.2  | 3.5 | 1.9  | 1.0  | 3.0 |
| Atrazine            | 99.7  | 94.7  | 77.3  | 6.0  | 4.0  | 7.7  | 2.2  | 3.4  | 6.8  | 93.0  | 92.3  | 94.0  | 3.1  | 0.6  | 3.1 | 4.6  | 1.4  | 1.5 |
| Acetochlor          | 80.1  | 101.7 | 97.7  | 6.8  | 9.2  | 4.1  | 14.8 | 8.5  | 5.8  | 94.1  | 94.9  | 96.7  | 12.2 | 2.0  | 2.8 | 3.3  | 1.0  | 1.6 |
| Clothianidin        | 83.2  | 117.4 | 85.8  | 18.1 | 4.8  | 6.8  | 17.7 | 7.4  | 0.2  | 91.1  | 88.7  | 96.0  | 9.8  | 10.9 | 1.3 | 12.2 | 5.0  | 3.7 |
| Fludioxonil         | 102.3 | 105.0 | 90.7  | 3.0  | 6.8  | 4.4  | 12.3 | 7.1  | 6.7  | 92.9  | 91.8  | 94.6  | 2.1  | 2.4  | 1.7 | 17.5 | 6.6  | 2.1 |

**Table S4.** Precision, and accuracy of target compounds in fat and milk fat

| Pesticide           | Fat                  |      |      |                      |      |     |                      |      |      | Milk fat             |       |       |                      |      |      |                      |      |     |
|---------------------|----------------------|------|------|----------------------|------|-----|----------------------|------|------|----------------------|-------|-------|----------------------|------|------|----------------------|------|-----|
|                     | spiked level (mg/kg) |      |      |                      |      |     |                      |      |      | spiked level (mg/kg) |       |       |                      |      |      |                      |      |     |
|                     | Recovery (%)         |      |      | RSD <sub>r</sub> (%) |      |     | RSD <sub>R</sub> (%) |      |      | Recovery (%)         |       |       | RSD <sub>r</sub> (%) |      |      | RSD <sub>R</sub> (%) |      |     |
|                     | 0.01/<br>0.02        | 0.1  | 1    | 0.01/<br>0.02        | 0.1  | 1   | 0.01/<br>0.02        | 0.1  | 1    | 0.01/<br>0.02        | 0.1   | 1     | 0.01/<br>0.02        | 0.1  | 1    | 0.01/<br>0.02        | 0.1  | 1   |
| Cyhalothrin         | 94.9                 | 70.8 | 78.7 | 8.6                  | 1.7  | 8.4 | 11.9                 | 19.8 | 9.2  | 71.5                 | 94.6  | 87.3  | 17.9                 | 9.8  | 13.7 | 12.5                 | 12.8 | 2.7 |
| Imidacloprid        | 83.1                 | 79.5 | 86.4 | 17.3                 | 6.0  | 5.0 | 5.2                  | 5.9  | 10.7 | 91.5                 | 87.0  | 80.9  | 14.9                 | 6.3  | 4.9  | 7.3                  | 2.4  | 3.8 |
| Beta cypermethrin   | 89.6                 | 81.4 | 80.2 | 10.2                 | 12.7 | 6.2 | 1.5                  | 3.8  | 17.0 | 79.1                 | 87.7  | 72.5  | 18.3                 | 6.4  | 10.5 | 8.6                  | 4.1  | 6.1 |
| Chlorpyrifos        | 65.2                 | 64.4 | 64.7 | 5.0                  | 1.9  | 2.5 | 0.6                  | 3.6  | 2.2  | 62.0                 | 72.7  | 72.0  | 7.7                  | 7.1  | 4.6  | 6.6                  | 2.6  | 1.1 |
| Chlorantraniliprole | 97.2                 | 84.2 | 90.9 | 13.9                 | 4.9  | 3.3 | 10.3                 | 3.1  | 13.0 | 106.2                | 87.7  | 90.4  | 14.9                 | 5.8  | 3.1  | 11.4                 | 6.4  | 2.1 |
| Cyantraniliprole    | 81.8                 | 92.3 | 90.9 | 15.7                 | 4.7  | 2.2 | 4.8                  | 4.6  | 13.0 | 87.2                 | 83.2  | 81.5  | 10.5                 | 3.0  | 6.7  | 6.3                  | 6.7  | 2.1 |
| Thiamethoxam        | 86.1                 | 95.0 | 87.8 | 7.5                  | 5.9  | 3.5 | 4.1                  | 2.3  | 11.0 | 102.5                | 87.9  | 83.7  | 7.9                  | 7.4  | 5.4  | 3.8                  | 3.8  | 1.8 |
| Carbaryl            | 79.4                 | 90.5 | 87.0 | 4.4                  | 3.2  | 2.4 | 6.7                  | 4.7  | 12.8 | 82.6                 | 88.9  | 81.0  | 10.1                 | 4.3  | 3.5  | 5.0                  | 4.2  | 1.0 |
| Emamectin benzoate  | 65.4                 | 74.5 | 75.4 | 3.7                  | 5.4  | 5.8 | 2.4                  | 3.1  | 4.1  | 69.9                 | 60.8  | 62.0  | 16.8                 | 9.7  | 5.0  | 5.1                  | 3.9  | 4.1 |
| Indoxacarb          | 84.7                 | 94.2 | 93.5 | 8.3                  | 5.0  | 2.0 | 4.9                  | 7.5  | 11.1 | 95.3                 | 101.0 | 98.3  | 11.7                 | 9.8  | 5.3  | 6.5                  | 4.6  | 3.0 |
| Acetamiprid         | 78.4                 | 95.7 | 95.9 | 6.1                  | 6.2  | 3.5 | 8.8                  | 4.6  | 13.1 | 81.2                 | 78.6  | 78.2  | 11.0                 | 4.1  | 8.0  | 14.1                 | 5.4  | 4.2 |
| Lufenuron           | 75.9                 | 88.3 | 86.6 | 12.8                 | 4.0  | 2.4 | 13.1                 | 5.3  | 10.2 | 100.6                | 109.8 | 98.1  | 19.3                 | 8.7  | 8.1  | 6.6                  | 4.3  | 0.4 |
| Dinotefuran         | 71.8                 | 97.6 | 96.0 | 4.3                  | 5.4  | 2.6 | 11.7                 | 4.7  | 11.2 | 79.0                 | 88.6  | 90.7  | 11.8                 | 4.4  | 4.1  | 13.6                 | 3.7  | 4.4 |
| Tebuconazole        | 83.9                 | 84.6 | 82.8 | 4.8                  | 6.7  | 2.2 | 9.6                  | 3.7  | 5.9  | 105.3                | 92.4  | 89.6  | 19.2                 | 10.1 | 5.2  | 0.6                  | 4.3  | 3.5 |
| Azoxystrobin        | 95.5                 | 95.9 | 96.3 | 8.3                  | 2.8  | 1.7 | 5.9                  | 1.7  | 12.9 | 91.1                 | 92.8  | 90.4  | 3.7                  | 5.6  | 3.6  | 0.9                  | 1.0  | 2.0 |
| Propiconazole       | 75.9                 | 84.8 | 80.2 | 6.0                  | 5.6  | 1.5 | 6.0                  | 5.8  | 6.7  | 73.4                 | 90.4  | 88.8  | 5.8                  | 7.7  | 3.5  | 11.1                 | 2.3  | 3.6 |
| Triadimefon         | 74.3                 | 87.9 | 85.9 | 7.5                  | 2.4  | 1.9 | 0.8                  | 3.4  | 7.9  | 98.8                 | 94.2  | 85.8  | 4.4                  | 7.4  | 6.1  | 1.7                  | 3.3  | 1.8 |
| Trifloxystrobin     | 104.2                | 89.5 | 87.3 | 17.1                 | 5.5  | 1.8 | 4.4                  | 4.0  | 7.8  | 90.3                 | 96.1  | 100.0 | 6.1                  | 4.6  | 2.8  | 3.1                  | 1.9  | 5.6 |
| Epoxiconazole       | 81.6                 | 90.0 | 88.0 | 4.3                  | 4.0  | 1.4 | 3.5                  | 3.5  | 7.8  | 100.8                | 89.0  | 90.0  | 3.5                  | 7.0  | 4.4  | 5.2                  | 2.9  | 3.2 |

|                |      |       |      |      |      |     |      |      |      |      |      |      |      |     |     |      |      |     |
|----------------|------|-------|------|------|------|-----|------|------|------|------|------|------|------|-----|-----|------|------|-----|
| Pyraclostrobin | 78.6 | 82.2  | 84.4 | 5.7  | 3.9  | 2.8 | 4.9  | 2.4  | 7.7  | 86.8 | 91.3 | 91.1 | 9.1  | 6.0 | 4.3 | 5.1  | 1.1  | 1.0 |
| Difenoconazole | 96.1 | 89.6  | 79.3 | 5.4  | 6.0  | 1.5 | 12.3 | 5.8  | 5.6  | 91.0 | 89.6 | 88.7 | 10.6 | 5.6 | 3.1 | 9.1  | 6.0  | 2.6 |
| Metalaxyl-M    | 77.2 | 94.2  | 90.7 | 12.3 | 5.4  | 1.3 | 6.1  | 5.9  | 10.9 | 94.2 | 91.8 | 89.9 | 14.8 | 2.4 | 1.7 | 5.8  | 3.2  | 2.1 |
| Carbendazim    | 69.1 | 81.1  | 78.8 | 3.7  | 2.2  | 2.3 | 1.6  | 2.5  | 7.9  | 84.3 | 90.8 | 85.1 | 4.4  | 2.7 | 3.5 | 2.0  | 4.9  | 3.9 |
| Atrazine       | 77.1 | 79.7  | 77.4 | 2.9  | 3.2  | 2.5 | 7.6  | 1.9  | 1.7  | 75.0 | 84.7 | 82.9 | 8.3  | 5.6 | 2.7 | 8.9  | 2.0  | 3.8 |
| Acetochlor     | 81.0 | 83.4  | 81.6 | 10.1 | 3.2  | 2.3 | 5.2  | 2.4  | 9.8  | 74.8 | 83.4 | 83.0 | 7.5  | 7.1 | 3.1 | 19.3 | 1.8  | 2.0 |
| Clothianidin   | 96.7 | 114.0 | 86.3 | 13.2 | 16.6 | 6.3 | 17.3 | 17.0 | 2.2  | 64.2 | 83.5 | 81.9 | 12.9 | 7.0 | 5.4 | 17.3 | 10.4 | 2.0 |
| Fludioxonil    | 85.1 | 88.1  | 89.5 | 6.4  | 1.9  | 1.9 | 3.2  | 1.1  | 4.6  | 91.7 | 90.6 | 88.5 | 6.9  | 6.7 | 4.0 | 2.5  | 3.2  | 3.0 |

**Table S5.** Precision, and accuracy of target compounds in liver and kidney

| Pesticide           | Liver                |       |      |                      |      |     |                      |     |     | Kidney               |      |      |                      |     |     |                      |      |     |
|---------------------|----------------------|-------|------|----------------------|------|-----|----------------------|-----|-----|----------------------|------|------|----------------------|-----|-----|----------------------|------|-----|
|                     | spiked level (mg/kg) |       |      |                      |      |     |                      |     |     | spiked level (mg/kg) |      |      |                      |     |     |                      |      |     |
|                     | Recovery (%)         |       |      | RSD <sub>r</sub> (%) |      |     | RSD <sub>R</sub> (%) |     |     | Recovery (%)         |      |      | RSD <sub>r</sub> (%) |     |     | RSD <sub>R</sub> (%) |      |     |
|                     | 0.01/<br>0.02        | 0.1   | 1    | 0.01/<br>0.02        | 0.1  | 1   | 0.01/<br>0.02        | 0.1 | 1   | 0.01/<br>0.02        | 0.1  | 1    | 0.01/<br>0.02        | 0.1 | 1   | 0.01/<br>0.02        | 0.1  | 1   |
| Cyhalothrin         | 93.6                 | 92.3  | 90.7 | 9.1                  | 7.1  | 7.9 | 2.7                  | 8.1 | 3.3 | 106.0                | 87.3 | 83.4 | 18.7                 | 4.3 | 4.6 | 9.4                  | 15.6 | 4.1 |
| Imidacloprid        | 104.1                | 100.7 | 85.4 | 17.8                 | 17.3 | 3.6 | 14.0                 | 6.0 | 0.6 | 85.7                 | 96.8 | 88.9 | 9.9                  | 3.8 | 3.0 | 3.9                  | 2.7  | 0.8 |
| Beta cypermethrin   | 97.1                 | 81.8  | 83.0 | 15.0                 | 8.9  | 4.6 | 14.3                 | 7.9 | 2.9 | 98.1                 | 96.2 | 83.5 | 14.1                 | 4.9 | 3.0 | 5.0                  | 5.4  | 1.8 |
| Chlorpyrifos        | 80.8                 | 84.0  | 90.4 | 5.7                  | 3.2  | 4.5 | 15.9                 | 2.4 | 4.4 | 87.1                 | 85.1 | 84.3 | 5.8                  | 2.8 | 2.5 | 11.3                 | 3.8  | 1.5 |
| Chlorantraniliprole | 110.3                | 99.6  | 79.4 | 12.0                 | 4.0  | 4.0 | 12.2                 | 4.9 | 2.0 | 113.2                | 95.4 | 87.0 | 13.0                 | 5.9 | 2.3 | 9.8                  | 4.5  | 1.5 |
| Cyantraniliprole    | 104.0                | 95.9  | 84.8 | 17.7                 | 5.8  | 3.5 | 13.9                 | 0.3 | 3.0 | 99.1                 | 87.1 | 85.5 | 1.9                  | 6.0 | 2.9 | 9.8                  | 4.6  | 1.2 |
| Thiamethoxam        | 76.7                 | 91.5  | 89.7 | 13.8                 | 5.2  | 2.8 | 2.6                  | 1.0 | 0.4 | 88.0                 | 91.2 | 87.4 | 5.0                  | 2.6 | 3.1 | 0.9                  | 2.8  | 1.6 |
| Carbaryl            | 85.8                 | 85.5  | 83.2 | 7.7                  | 2.6  | 3.1 | 11.1                 | 2.5 | 5.5 | 87.6                 | 93.2 | 91.6 | 7.1                  | 4.9 | 4.7 | 3.3                  | 6.7  | 4.3 |
| Emamectin benzoate  | 67.2                 | 87.7  | 73.9 | 5.5                  | 6.1  | 4.1 | 6.5                  | 6.9 | 1.9 | 67.8                 | 68.7 | 70.9 | 8.1                  | 6.1 | 1.6 | 9.2                  | 4.1  | 7.8 |
| Indoxacarb          | 92.2                 | 99.5  | 84.7 | 12.6                 | 4.0  | 4.2 | 17.0                 | 2.7 | 2.4 | 104.7                | 93.2 | 87.9 | 5.0                  | 5.6 | 1.9 | 10.6                 | 6.6  | 2.5 |



|                 |       |       |      |      |      |     |      |     |     |      |      |      |      |      |      |      |      |     |
|-----------------|-------|-------|------|------|------|-----|------|-----|-----|------|------|------|------|------|------|------|------|-----|
| Acetamiprid     | 95.3  | 89.5  | 85.8 | 14.6 | 5.3  | 2.0 | 19.8 | 1.7 | 3.7 | 90.8 | 85.3 | 78.7 | 10.6 | 4.5  | 4.2  | 12.9 | 4.4  | 5.1 |
| Lufenuron       | 87.5  | 92.6  | 88.3 | 19.8 | 2.7  | 3.1 | 17.2 | 1.8 | 1.7 | 91.6 | 93.0 | 82.0 | 8.8  | 5.7  | 3.6  | 4.4  | 1.4  | 4.1 |
| Dinotefuran     | 69.7  | 83.1  | 81.5 | 5.5  | 2.9  | 2.1 | 13.5 | 1.7 | 3.0 | 97.2 | 90.1 | 86.4 | 6.9  | 3.6  | 1.9  | 17.4 | 2.8  | 4.1 |
| Tebuconazole    | 91.5  | 92.3  | 86.9 | 5.8  | 5.8  | 3.7 | 4.4  | 4.1 | 4.0 | 93.5 | 94.8 | 77.7 | 9.4  | 6.3  | 2.3  | 9.0  | 17.7 | 4.6 |
| Azoxystrobin    | 101.0 | 98.6  | 88.8 | 9.4  | 3.8  | 3.5 | 13.3 | 1.8 | 1.4 | 91.2 | 96.1 | 89.7 | 8.6  | 4.2  | 2.0  | 1.8  | 1.9  | 1.3 |
| Propiconazole   | 82.9  | 91.9  | 84.9 | 5.8  | 1.5  | 3.0 | 9.4  | 1.3 | 1.2 | 81.2 | 90.9 | 85.1 | 4.9  | 3.5  | 3.8  | 8.3  | 1.4  | 1.8 |
| Triadimefon     | 88.8  | 96.2  | 90.5 | 3.4  | 4.4  | 2.6 | 10.1 | 2.9 | 3.3 | 93.7 | 95.3 | 85.8 | 3.9  | 2.7  | 2.8  | 0.6  | 2.5  | 1.2 |
| Trifloxystrobin | 100.5 | 98.4  | 87.3 | 6.9  | 3.5  | 2.6 | 15.2 | 3.6 | 1.6 | 90.5 | 93.9 | 89.1 | 3.7  | 3.1  | 2.5  | 1.2  | 2.2  | 3.0 |
| Epoxiconazole   | 92.1  | 98.5  | 86.0 | 5.5  | 3.5  | 3.8 | 13.0 | 2.1 | 0.3 | 90.5 | 94.5 | 85.7 | 4.2  | 3.2  | 1.8  | 1.7  | 2.8  | 1.2 |
| Pyraclostrobin  | 100.6 | 90.7  | 87.1 | 4.6  | 4.2  | 3.6 | 18.2 | 1.7 | 2.3 | 95.6 | 92.5 | 86.9 | 5.2  | 4.0  | 3.5  | 2.2  | 3.3  | 2.4 |
| Difenoconazole  | 105.1 | 92.8  | 89.9 | 7.3  | 2.7  | 5.7 | 4.6  | 4.5 | 2.3 | 93.3 | 93.3 | 84.5 | 8.4  | 5.9  | 1.9  | 2.2  | 2.5  | 0.8 |
| Metalaxyl-M     | 84.5  | 94.8  | 84.9 | 17.8 | 1.9  | 1.9 | 8.7  | 2.7 | 2.4 | 94.3 | 92.3 | 90.5 | 6.2  | 3.7  | 2.8  | 3.3  | 0.7  | 3.6 |
| Carbendazim     | 79.9  | 84.8  | 84.2 | 3.1  | 2.3  | 3.3 | 11.7 | 0.7 | 2.9 | 84.3 | 86.2 | 88.3 | 7.3  | 3.1  | 4.4  | 5.7  | 2.2  | 4.4 |
| Atrazine        | 82.7  | 91.4  | 86.7 | 6.7  | 4.2  | 4.3 | 14.2 | 0.7 | 2.0 | 89.8 | 90.8 | 84.8 | 3.8  | 3.6  | 1.6  | 0.9  | 2.2  | 0.7 |
| Acetochlor      | 99.2  | 100.6 | 86.3 | 14.1 | 4.8  | 3.1 | 8.5  | 4.7 | 0.6 | 94.4 | 94.1 | 84.2 | 3.1  | 3.0  | 2.7  | 1.9  | 1.9  | 4.3 |
| Clothianidin    | 76.6  | 71.7  | 86.7 | 17.5 | 10.2 | 4.1 | 7.2  | 9.8 | 1.2 | 77.0 | 94.1 | 84.4 | 13.6 | 11.5 | 4.9  | 12.2 | 9.6  | 1.3 |
| Fludioxonil     | 93.7  | 96.4  | 88.7 | 3.4  | 3.8  | 2.4 | 17.5 | 3.8 | 4.8 | 89.3 | 83.0 | 93.3 | 3.7  | 6.3  | 15.3 | 6.1  | 3.0  | 3.3 |

**Table S6.** Precision, and accuracy of target compounds in milk and cow stomach

| Pesticide     | Milk                 |      |               |                      |      |               |                      |     |               | Cow stomach          |      |               |                      |     |               |                      |     |     |
|---------------|----------------------|------|---------------|----------------------|------|---------------|----------------------|-----|---------------|----------------------|------|---------------|----------------------|-----|---------------|----------------------|-----|-----|
|               | spiked level (mg/kg) |      |               |                      |      |               |                      |     |               | spiked level (mg/kg) |      |               |                      |     |               |                      |     |     |
|               | Recovery (%)         |      |               | RSD <sub>r</sub> (%) |      |               | RSD <sub>R</sub> (%) |     |               | Recovery (%)         |      |               | RSD <sub>r</sub> (%) |     |               | RSD <sub>R</sub> (%) |     |     |
| 0.01/<br>0.02 | 0.1                  | 1    | 0.01/<br>0.02 | 0.1                  | 1    | 0.01/<br>0.02 | 0.1                  | 1   | 0.01/<br>0.02 | 0.1                  | 1    | 0.01/<br>0.02 | 0.1                  | 1   | 0.01/<br>0.02 | 0.1                  | 1   |     |
| Cyhalothrin   | 83.4                 | 70.3 | 75.4          | 7.8                  | 11.0 | 2.9           | 8.0                  | 2.1 | 3.7           | 102.1                | 75.9 | 71.1          | 10.9                 | 8.8 | 4.4           | 11.6                 | 3.0 | 2.2 |

|                     |       |       |      |      |      |     |      |      |     |       |       |      |      |     |     |      |      |      |
|---------------------|-------|-------|------|------|------|-----|------|------|-----|-------|-------|------|------|-----|-----|------|------|------|
| Imidacloprid        | 99.1  | 94.7  | 90.0 | 12.6 | 10.5 | 3.6 | 12.7 | 11.3 | 4.2 | 81.1  | 72.9  | 93.0 | 13.0 | 3.4 | 3.8 | 4.7  | 2.5  | 4.4  |
| Beta cypermethrin   | 78.9  | 70.7  | 83.7 | 12.8 | 1.9  | 4.3 | 8.8  | 1.2  | 7.5 | 76.3  | 73.2  | 62.7 | 16.9 | 6.7 | 7.0 | 9.4  | 3.8  | 3.2  |
| Chlorpyrifos        | 78.7  | 79.0  | 85.1 | 9.2  | 4.3  | 2.3 | 1.8  | 1.0  | 8.4 | 93.8  | 79.2  | 70.3 | 4.1  | 2.3 | 5.8 | 7.8  | 9.1  | 1.9  |
| Chlorantraniliprole | 102.8 | 96.0  | 97.6 | 9.3  | 6.8  | 6.3 | 9.4  | 8.9  | 4.0 | 98.9  | 74.4  | 85.3 | 13.3 | 2.4 | 4.8 | 15.4 | 4.2  | 2.5  |
| Cyantraniliprole    | 95.7  | 99.2  | 93.1 | 13.5 | 4.3  | 4.6 | 11.0 | 16.7 | 5.9 | 95.0  | 69.4  | 82.1 | 12.8 | 5.3 | 4.9 | 18.5 | 6.5  | 1.2  |
| Thiamethoxam        | 89.4  | 93.2  | 93.3 | 5.9  | 3.4  | 4.7 | 7.1  | 14.1 | 5.2 | 101.3 | 89.9  | 92.5 | 15.7 | 9.0 | 1.9 | 10.9 | 0.5  | 0.6  |
| Carbaryl            | 94.0  | 84.6  | 91.2 | 3.6  | 2.8  | 2.0 | 5.0  | 6.3  | 7.1 | 68.1  | 66.5  | 79.9 | 8.2  | 3.3 | 5.0 | 3.7  | 4.9  | 4.1  |
| Emamectin benzoate  | 76.5  | 74.8  | 77.6 | 6.0  | 6.2  | 5.7 | 12.2 | 8.4  | 2.6 | 60.7  | 61.0  | 63.6 | 7.6  | 8.1 | 9.0 | 9.2  | 5.2  | 10.6 |
| Indoxacarb          | 103.4 | 90.0  | 91.3 | 9.2  | 5.2  | 5.5 | 4.4  | 6.4  | 1.9 | 82.5  | 72.8  | 71.8 | 9.0  | 1.8 | 3.9 | 5.5  | 10.9 | 7.7  |
| Acetamiprid         | 87.5  | 88.3  | 98.3 | 9.1  | 4.4  | 4.1 | 5.0  | 9.8  | 6.5 | 89.7  | 80.6  | 85.9 | 3.9  | 2.9 | 3.9 | 8.4  | 2.9  | 2.8  |
| Lufenuron           | 79.2  | 77.0  | 78.9 | 7.1  | 3.8  | 2.7 | 3.5  | 4.7  | 3.9 | 77.8  | 83.6  | 71.3 | 5.4  | 8.0 | 3.3 | 9.9  | 17.5 | 10.0 |
| Dinotefuran         | 90.5  | 82.5  | 86.6 | 7.0  | 3.1  | 4.6 | 4.2  | 7.8  | 4.4 | 70.4  | 92.3  | 94.9 | 9.7  | 4.3 | 2.7 | 16.3 | 6.7  | 7.7  |
| Tebuconazole        | 111.9 | 103.7 | 95.8 | 10.5 | 10.2 | 3.8 | 5.5  | 15.0 | 6.5 | 103.8 | 85.2  | 78.5 | 18.8 | 2.5 | 4.0 | 2.7  | 9.0  | 1.2  |
| Azoxystrobin        | 101.7 | 94.1  | 95.2 | 1.3  | 3.0  | 4.4 | 4.7  | 10.1 | 3.4 | 112.1 | 83.7  | 85.2 | 13.5 | 5.0 | 4.6 | 1.1  | 0.5  | 2.1  |
| Propiconazole       | 95.1  | 90.7  | 90.7 | 5.3  | 2.7  | 1.3 | 1.8  | 12.6 | 3.5 | 92.2  | 71.9  | 79.1 | 5.9  | 2.8 | 3.2 | 7.9  | 1.1  | 2.1  |
| Triadimefon         | 95.6  | 96.2  | 90.3 | 6.6  | 2.2  | 2.2 | 2.2  | 13.5 | 4.5 | 93.4  | 77.3  | 81.4 | 5.6  | 3.6 | 3.7 | 5.9  | 2.3  | 1.2  |
| Trifloxystrobin     | 92.7  | 87.6  | 90.7 | 2.7  | 3.7  | 4.3 | 2.6  | 12.0 | 3.8 | 89.7  | 74.4  | 73.5 | 4.2  | 3.2 | 4.3 | 6.5  | 8.8  | 5.7  |
| Epoxiconazole       | 98.6  | 93.5  | 94.3 | 6.1  | 5.9  | 2.8 | 3.0  | 9.6  | 6.1 | 92.9  | 79.7  | 79.1 | 4.5  | 1.2 | 3.8 | 4.0  | 4.3  | 1.4  |
| Pyraclostrobin      | 98.2  | 88.9  | 91.0 | 4.9  | 6.4  | 5.5 | 7.5  | 9.8  | 1.2 | 97.2  | 71.9  | 72.1 | 10.7 | 3.9 | 4.7 | 7.0  | 4.6  | 2.3  |
| Difenoconazole      | 107.0 | 91.8  | 91.6 | 7.7  | 4.5  | 2.8 | 4.2  | 13.7 | 3.4 | 81.9  | 70.9  | 75.5 | 5.3  | 6.3 | 5.7 | 6.8  | 7.3  | 3.2  |
| Metalaxyl-M         | 93.3  | 91.0  | 93.0 | 16.5 | 4.9  | 4.1 | 6.4  | 9.5  | 2.1 | 91.6  | 88.5  | 96.0 | 6.2  | 2.5 | 3.3 | 2.9  | 1.7  | 2.6  |
| Carbendazim         | 93.2  | 87.9  | 84.9 | 2.4  | 3.2  | 3.6 | 2.5  | 10.4 | 3.4 | 84.4  | 88.2  | 90.1 | 3.4  | 3.2 | 4.7 | 2.1  | 3.8  | 1.1  |
| Atrazine            | 93.1  | 89.5  | 86.7 | 2.5  | 3.7  | 2.0 | 1.9  | 11.9 | 2.7 | 87.3  | 85.1  | 87.6 | 6.9  | 1.3 | 2.6 | 0.5  | 1.7  | 1.5  |
| Acetochlor          | 93.9  | 83.1  | 86.0 | 9.5  | 1.7  | 2.7 | 18.7 | 8.4  | 3.3 | 108.9 | 75.0  | 84.2 | 8.3  | 2.9 | 3.7 | 8.6  | 4.7  | 0.8  |
| Clothianidin        | 82.8  | 78.7  | 94.2 | 11.5 | 5.5  | 4.1 | 24.2 | 3.5  | 8.2 | 100.2 | 113.7 | 88.6 | 13.6 | 9.4 | 4.0 | 11.7 | 17.5 | 3.3  |
| Fludioxonil         | 93.3  | 91.2  | 95.0 | 3.9  | 1.5  | 4.1 | 9.6  | 2.1  | 1.6 | 89.6  | 80.8  | 85.1 | 6.1  | 2.6 | 3.6 | 14.0 | 2.1  | 0.8  |

**Table S7.** Analysis of variance (ANOVA) was used to evaluate the linearity of the compounds in corn, fresh corn, fresh corn stover substrates and old corn stove

| Pesticide           | Corn                        |                |                | Fresh corn                  |                |                | Fresh corn stover           |                |                | Old corn stover             |                |                |
|---------------------|-----------------------------|----------------|----------------|-----------------------------|----------------|----------------|-----------------------------|----------------|----------------|-----------------------------|----------------|----------------|
|                     | Linearity (R <sup>2</sup> ) | <i>F</i> value | <i>P</i> value | Linearity (R <sup>2</sup> ) | <i>F</i> value | <i>P</i> value | Linearity (R <sup>2</sup> ) | <i>F</i> value | <i>P</i> value | Linearity (R <sup>2</sup> ) | <i>F</i> value | <i>P</i> value |
| Cyhalothrin         | 0.9988                      | 4845.342       | <0.05          | 0.9989                      | 5505.173       | <0.05          | 0.9985                      | 4015.869       | <0.05          | 0.9942                      | 1026.983       | <0.05          |
| Imidacloprid        | 0.9999                      | 43436.199      | <0.05          | 0.9915                      | 700.413        | <0.05          | 0.9946                      | 1108.308       | <0.05          | 0.9961                      | 1542.661       | <0.05          |
| Beta cypermethrin   | 0.9942                      | 852.461        | <0.05          | 0.9975                      | 2436.014       | <0.05          | 0.9960                      | 1496.584       | <0.05          | 0.9989                      | 5218.945       | <0.05          |
| Chlorpyrifos        | 0.9991                      | 5494.204       | <0.05          | 0.9999                      | 41247.630      | <0.05          | 0.9958                      | 1429.462       | <0.05          | 0.9945                      | 1091.234       | <0.05          |
| Chlorantraniliprole | 0.9997                      | 15150.134      | <0.05          | 0.9993                      | 6786.684       | <0.05          | 0.9961                      | 1546.514       | <0.05          | 0.9972                      | 2148.307       | <0.05          |
| Cyantraniliprole    | 0.9937                      | 19993.812      | <0.05          | 1.0000                      | 111324.495     | <0.05          | 0.9973                      | 2194.140       | <0.05          | 0.9990                      | 5728.607       | <0.05          |
| Thiamethoxam        | 0.9976                      | 2072.279       | <0.05          | 0.9959                      | 1206.941       | <0.05          | 0.9990                      | 5148.663       | <0.05          | 0.9937                      | 940.777        | <0.05          |
| Carbaryl            | 0.9927                      | 29342.154      | <0.05          | 0.9986                      | 3598.413       | <0.05          | 0.9957                      | 1379.877       | <0.05          | 0.9926                      | 800.539        | <0.05          |
| Emamectin benzoate  | 0.9989                      | 4418.194       | <0.05          | 1.0000                      | 1282717.316    | <0.05          | 0.9944                      | 1066.804       | <0.05          | 0.9948                      | 1144.914       | <0.05          |
| Indoxacarb          | 0.9996                      | 13642.879      | <0.05          | 0.9976                      | 2060.631       | <0.05          | 0.9964                      | 1373.826       | <0.05          | 0.9944                      | 1062.407       | <0.05          |
| Acetamiprid         | 0.9945                      | 13553.385      | <0.05          | 0.9999                      | 35885.574      | <0.05          | 0.9937                      | 943.003        | <0.05          | 0.9961                      | 1541.731       | <0.05          |
| Lufenuron           | 0.9974                      | 10420.894      | <0.05          | 0.9999                      | 41045.747      | <0.05          | 0.9994                      | 10532.938      | <0.05          | 0.9992                      | 7688.971       | <0.05          |
| Dinotefuran         | 0.9979                      | 2336.274       | <0.05          | 0.9929                      | 559.335        | <0.05          | 0.9923                      | 515.098        | <0.05          | 0.9955                      | 1100.011       | <0.05          |
| Tebuconazole        | 0.9981                      | 4039.635       | <0.05          | 0.9993                      | 7138.825       | <0.05          | 0.9948                      | 1152.862       | <0.05          | 0.9959                      | 1439.897       | <0.05          |
| Azoxystrobin        | 0.9964                      | 1373.952       | <0.05          | 0.9991                      | 5743.127       | <0.05          | 0.9993                      | 7057.792       | <0.05          | 0.9957                      | 1396.921       | <0.05          |
| Propiconazole       | 0.9990                      | 5085.411       | <0.05          | 0.9989                      | 4410.827       | <0.05          | 0.9911                      | 669.967        | <0.05          | 0.9952                      | 1236.529       | <0.05          |
| Triadimefon         | 0.9946                      | 18810.185      | <0.05          | 0.9998                      | 20425.334      | <0.05          | 0.9969                      | 1946.017       | <0.05          | 0.9974                      | 2298.181       | <0.05          |
| Trifloxystrobin     | 0.9996                      | 13544.423      | <0.05          | 0.9976                      | 2089.219       | <0.05          | 0.9997                      | 17422.136      | <0.05          | 0.9927                      | 814.336        | <0.05          |
| Epoxiconazole       | 0.9981                      | 2607.845       | <0.05          | 0.9988                      | 4217.446       | <0.05          | 0.9943                      | 1054.755       | <0.05          | 0.9943                      | 1045.061       | <0.05          |
| Pyraclostrobin      | 0.9934                      | 752.639        | <0.05          | 0.9981                      | 2618.970       | <0.05          | 0.9989                      | 4422.083       | <0.05          | 0.9944                      | 1068.041       | <0.05          |

|                |        |           |       |        |           |       |        |           |       |        |          |       |
|----------------|--------|-----------|-------|--------|-----------|-------|--------|-----------|-------|--------|----------|-------|
| Difenoconazole | 0.9932 | 728.132   | <0.05 | 0.9980 | 2485.429  | <0.05 | 0.9963 | 1599.857  | <0.05 | 0.9968 | 1876.620 | <0.05 |
| Metalaxyl-M    | 0.9992 | 6085.230  | <0.05 | 0.9993 | 7448.657  | <0.05 | 0.9902 | 608.813   | <0.05 | 0.9915 | 697.988  | <0.05 |
| Carbendazim    | 0.9995 | 9215.905  | <0.05 | 0.9909 | 546.430   | <0.05 | 0.9914 | 575.650   | <0.05 | 0.9979 | 382.359  | <0.05 |
| Atrazine       | 0.9998 | 24739.515 | <0.05 | 0.9999 | 42305.411 | <0.05 | 0.9999 | 40479.574 | <0.05 | 0.9963 | 1624.475 | <0.05 |
| Acetochlor     | 0.9997 | 15481.656 | <0.05 | 0.9997 | 18133.883 | <0.05 | 0.9995 | 9904.565  | <0.05 | 0.9927 | 818.033  | <0.05 |
| Clothianidin   | 0.9987 | 3734.966  | <0.05 | 0.9989 | 4655.272  | <0.05 | 0.9994 | 8548.176  | <0.05 | 0.9944 | 1059.554 | <0.05 |
| Fludioxonil    | 0.9910 | 548.263   | <0.05 | 0.9919 | 615.900   | <0.05 | 0.9916 | 589.884   | <0.05 | 0.9975 | 1979.945 | <0.05 |

**Table S8.** Analysis of variance (ANOVA) was used to evaluate the linearity of the compounds in corn silage, beef, fat and milk fat

| Pesticide           | Corn silage                 |          |         | Beef                        |           |         | Fat                         |           |         | Milk fat                    |           |         |
|---------------------|-----------------------------|----------|---------|-----------------------------|-----------|---------|-----------------------------|-----------|---------|-----------------------------|-----------|---------|
|                     | Linearity (R <sup>2</sup> ) | F value  | P value | Linearity (R <sup>2</sup> ) | F value   | P value | Linearity (R <sup>2</sup> ) | F value   | P value | Linearity (R <sup>2</sup> ) | F value   | P value |
| Cyhalothrin         | 0.9945                      | 724.296  | <0.05   | 0.9961                      | 2301.782  | <0.05   | 0.9945                      | 4850.436  | <0.05   | 0.9934                      | 1616.256  | <0.05   |
| Imidacloprid        | 0.9995                      | 902.229  | <0.05   | 0.9919                      | 1169.404  | <0.05   | 0.9995                      | 3506.816  | <0.05   | 0.9910                      | 1716.532  | <0.05   |
| Beta cypermethrin   | 0.9962                      | 1491.872 | <0.05   | 0.9994                      | 3303.725  | <0.05   | 0.9962                      | 11019.307 | <0.05   | 0.9987                      | 10390.576 | <0.05   |
| Chlorpyrifos        | 0.9966                      | 2174.004 | <0.05   | 0.9958                      | 3483.103  | <0.05   | 0.9966                      | 7094.611  | <0.05   | 0.9975                      | 3607.871  | <0.05   |
| Chlorantraniliprole | 0.9976                      | 2571.619 | <0.05   | 0.9999                      | 5883.311  | <0.05   | 0.9976                      | 576.376   | <0.05   | 0.9949                      | 3820.697  | <0.05   |
| Cyantraniliprole    | 0.9975                      | 5195.845 | <0.05   | 0.9957                      | 3256.062  | <0.05   | 0.9975                      | 17652.514 | <0.05   | 0.9981                      | 25513.666 | <0.05   |
| Thiamethoxam        | 0.9905                      | 721.937  | <0.05   | 0.9903                      | 1293.771  | <0.05   | 0.9905                      | 1466.947  | <0.05   | 0.9995                      | 10955.232 | <0.05   |
| Carbaryl            | 0.9930                      | 1854.680 | <0.05   | 0.9947                      | 3247.586  | <0.05   | 0.9930                      | 1498.109  | <0.05   | 0.9983                      | 6394.106  | <0.05   |
| Emamectin benzoate  | 0.9996                      | 1240.414 | <0.05   | 0.9997                      | 12646.271 | <0.05   | 0.9996                      | 8888.297  | <0.05   | 0.9976                      | 9587.627  | <0.05   |
| Indoxacarb          | 0.9990                      | 1389.636 | <0.05   | 0.9995                      | 2023.498  | <0.05   | 0.9990                      | 1347.535  | <0.05   | 0.9953                      | 5057.290  | <0.05   |
| Acetamiprid         | 0.9928                      | 2191.773 | <0.05   | 0.9996                      | 18037.622 | <0.05   | 0.9928                      | 2402.956  | <0.05   | 0.9936                      | 3420.617  | <0.05   |
| Lufenuron           | 0.9972                      | 986.022  | <0.05   | 0.9986                      | 18668.163 | <0.05   | 0.9972                      | 9430.591  | <0.05   | 0.9985                      | 29635.978 | <0.05   |
| Dinotefuran         | 0.9991                      | 516.643  | <0.05   | 0.9975                      | 686.615   | <0.05   | 0.9991                      | 4083.067  | <0.05   | 0.9993                      | 2288.148  | <0.05   |

|                 |        |          |       |        |          |       |        |          |       |        |           |       |
|-----------------|--------|----------|-------|--------|----------|-------|--------|----------|-------|--------|-----------|-------|
| Tebuconazole    | 0.9989 | 1586.297 | <0.05 | 0.9998 | 9814.909 | <0.05 | 0.9989 | 1180.561 | <0.05 | 0.9988 | 4962.292  | <0.05 |
| Azoxystrobin    | 0.9990 | 1232.295 | <0.05 | 0.9999 | 4689.833 | <0.05 | 0.9990 | 1752.948 | <0.05 | 0.9994 | 1589.333  | <0.05 |
| Propiconazole   | 0.9996 | 942.887  | <0.05 | 0.9996 | 2245.662 | <0.05 | 0.9996 | 2842.301 | <0.05 | 0.9997 | 5904.115  | <0.05 |
| Triadimefon     | 0.9982 | 2146.494 | <0.05 | 0.9997 | 1951.961 | <0.05 | 0.9982 | 828.452  | <0.05 | 0.9993 | 2199.746  | <0.05 |
| Trifloxystrobin | 0.9996 | 1295.198 | <0.05 | 0.9904 | 1339.989 | <0.05 | 0.9996 | 2568.968 | <0.05 | 0.9996 | 4344.399  | <0.05 |
| Epoxiconazole   | 0.9920 | 2076.343 | <0.05 | 0.9998 | 2355.443 | <0.05 | 0.9920 | 1696.486 | <0.05 | 0.9991 | 1276.731  | <0.05 |
| Pyraclostrobin  | 0.9997 | 821.361  | <0.05 | 0.9999 | 4249.371 | <0.05 | 0.9997 | 4197.654 | <0.05 | 0.9988 | 50135.993 | <0.05 |
| Difenoconazole  | 0.9998 | 2084.787 | <0.05 | 0.9999 | 5820.241 | <0.05 | 0.9998 | 5859.806 | <0.05 | 0.9991 | 30087.858 | <0.05 |
| Metalaxyl-M     | 0.9986 | 687.163  | <0.05 | 0.9997 | 1834.319 | <0.05 | 0.9986 | 1016.846 | <0.05 | 0.9995 | 2105.642  | <0.05 |
| Carbendazim     | 0.9987 | 561.344  | <0.05 | 0.9987 | 1054.178 | <0.05 | 0.9987 | 5874.723 | <0.05 | 0.9996 | 5039.866  | <0.05 |
| Atrazine        | 0.9994 | 2920.629 | <0.05 | 0.9993 | 1268.867 | <0.05 | 0.9994 | 2129.982 | <0.05 | 0.9991 | 1254.832  | <0.05 |
| Acetochlor      | 0.9995 | 645.784  | <0.05 | 0.9979 | 2837.905 | <0.05 | 0.9995 | 1843.393 | <0.05 | 0.9995 | 1954.344  | <0.05 |
| Clothianidin    | 0.9981 | 1130.873 | <0.05 | 0.9999 | 9360.244 | <0.05 | 0.9981 | 800.567  | <0.05 | 0.9967 | 568.418   | <0.05 |
| Fludioxonil     | 0.9904 | 806.101  | <0.05 | 0.9951 | 446.981  | <0.05 | 0.9904 | 260.504  | <0.05 | 0.9975 | 831.517   | <0.05 |

**Table S9.** Analysis of variance (ANOVA) was used to evaluate the linearity of the compounds in liver, kidney, milk and cow stomach

| Pesticide           | Liver                       |           |         | Kidney                      |           |         | Milk                        |           |         | Cow stomach                 |          |         |
|---------------------|-----------------------------|-----------|---------|-----------------------------|-----------|---------|-----------------------------|-----------|---------|-----------------------------|----------|---------|
|                     | Linearity (R <sup>2</sup> ) | F value   | P value | Linearity (R <sup>2</sup> ) | F value   | P value | Linearity (R <sup>2</sup> ) | F value   | P value | Linearity (R <sup>2</sup> ) | F value  | P value |
| Cyhalothrin         | 0.9999                      | 7457.823  | <0.05   | 0.9987                      | 22932.519 | <0.05   | 0.9983                      | 16722.183 | <0.05   | 0.9958                      | 2730.794 | <0.05   |
| Imidacloprid        | 0.9911                      | 1538.382  | <0.05   | 0.9994                      | 2006.350  | <0.05   | 0.9988                      | 1070.399  | <0.05   | 0.9938                      | 1642.565 | <0.05   |
| Beta cypermethrin   | 0.9975                      | 2046.010  | <0.05   | 0.9920                      | 1980.955  | <0.05   | 0.9984                      | 897.394   | <0.05   | 0.9979                      | 4283.926 | <0.05   |
| Chlorpyrifos        | 0.9991                      | 16337.790 | <0.05   | 0.9972                      | 7372.305  | <0.05   | 0.9993                      | 1499.135  | <0.05   | 0.9955                      | 1971.373 | <0.05   |
| Chlorantraniliprole | 0.9967                      | 2445.333  | <0.05   | 0.9978                      | 728.321   | <0.05   | 0.9987                      | 1162.290  | <0.05   | 0.9951                      | 1601.784 | <0.05   |
| Cyantraniliprole    | 0.9983                      | 8177.098  | <0.05   | 0.9953                      | 5677.258  | <0.05   | 0.9998                      | 3846.536  | <0.05   | 0.9940                      | 1197.421 | <0.05   |

|                    |        |          |       |        |          |       |        |          |       |        |           |       |
|--------------------|--------|----------|-------|--------|----------|-------|--------|----------|-------|--------|-----------|-------|
| Thiamethoxam       | 0.9990 | 1579.117 | <0.05 | 0.9987 | 1003.552 | <0.05 | 0.9948 | 393.846  | <0.05 | 0.9945 | 1831.645  | <0.05 |
| Carbaryl           | 0.9990 | 5940.991 | <0.05 | 0.9992 | 1553.714 | <0.05 | 0.9965 | 515.519  | <0.05 | 0.9985 | 58073.808 | <0.05 |
| Emamectin benzoate | 0.9912 | 1640.055 | <0.05 | 0.9986 | 1001.817 | <0.05 | 0.9989 | 1101.010 | <0.05 | 0.9937 | 1424.886  | <0.05 |
| Indoxacarb         | 0.9992 | 1473.015 | <0.05 | 0.9978 | 729.611  | <0.05 | 0.9987 | 1012.389 | <0.05 | 0.9928 | 1223.353  | <0.05 |
| Acetamiprid        | 0.9940 | 2890.162 | <0.05 | 0.9991 | 1237.447 | <0.05 | 0.9984 | 863.030  | <0.05 | 0.9957 | 1642.961  | <0.05 |
| Lufenuron          | 0.9995 | 2638.177 | <0.05 | 0.9994 | 4647.034 | <0.05 | 0.9950 | 394.309  | <0.05 | 0.9969 | 1785.214  | <0.05 |
| Dinotefuran        | 0.9970 | 650.271  | <0.05 | 0.9985 | 1098.741 | <0.05 | 0.9961 | 479.696  | <0.05 | 0.9966 | 10191.937 | <0.05 |
| Tebuconazole       | 0.9975 | 911.562  | <0.05 | 0.9975 | 645.768  | <0.05 | 0.9988 | 1666.371 | <0.05 | 0.9956 | 4395.505  | <0.05 |
| Azoxystrobin       | 0.9991 | 1781.140 | <0.05 | 0.9987 | 1057.409 | <0.05 | 0.9970 | 618.311  | <0.05 | 0.9942 | 1353.306  | <0.05 |
| Propiconazole      | 0.9990 | 2145.122 | <0.05 | 0.9994 | 1715.035 | <0.05 | 0.9983 | 882.602  | <0.05 | 0.9914 | 1048.625  | <0.05 |
| Triadimefon        | 0.9993 | 2206.965 | <0.05 | 0.9995 | 2179.254 | <0.05 | 0.9991 | 1513.661 | <0.05 | 0.9909 | 826.235   | <0.05 |
| Trifloxystrobin    | 0.9994 | 2878.165 | <0.05 | 0.9995 | 2720.533 | <0.05 | 0.9986 | 1053.551 | <0.05 | 0.9950 | 2173.957  | <0.05 |
| Epoxiconazole      | 0.9989 | 6937.240 | <0.05 | 0.9975 | 679.200  | <0.05 | 0.9979 | 800.149  | <0.05 | 0.9930 | 1181.540  | <0.05 |
| Pyraclostrobin     | 0.9989 | 6434.524 | <0.05 | 0.9998 | 4374.100 | <0.05 | 0.9980 | 768.557  | <0.05 | 0.9954 | 2343.282  | <0.05 |
| Difenoconazole     | 0.9992 | 4218.148 | <0.05 | 0.9972 | 594.032  | <0.05 | 0.9999 | 5142.282 | <0.05 | 0.9935 | 1257.888  | <0.05 |
| Metalaxyl-M        | 0.9981 | 957.503  | <0.05 | 0.9994 | 1985.879 | <0.05 | 0.9975 | 662.540  | <0.05 | 0.9920 | 1060.332  | <0.05 |
| Carbendazim        | 0.9988 | 1353.604 | <0.05 | 0.9981 | 823.299  | <0.05 | 0.9974 | 640.682  | <0.05 | 0.9976 | 38504.189 | <0.05 |
| Atrazine           | 0.9990 | 1456.328 | <0.05 | 0.9985 | 1024.944 | <0.05 | 0.9986 | 562.032  | <0.05 | 0.9944 | 1307.534  | <0.05 |
| Acetochlor         | 0.9984 | 996.620  | <0.05 | 0.9990 | 1396.482 | <0.05 | 0.9981 | 917.612  | <0.05 | 0.9938 | 1309.658  | <0.05 |
| Clothianidin       | 0.9993 | 1819.413 | <0.05 | 0.9983 | 937.647  | <0.05 | 0.9976 | 666.402  | <0.05 | 0.9975 | 5986.157  | <0.05 |
| Fludioxonil        | 0.9945 | 412.525  | <0.05 | 0.9926 | 308.661  | <0.05 | 0.9933 | 342.567  | <0.05 | 0.9943 | 2509.866  | <0.05 |

Cyhalothrin

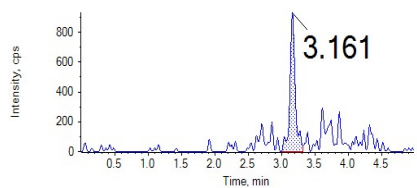

Imidacloprid

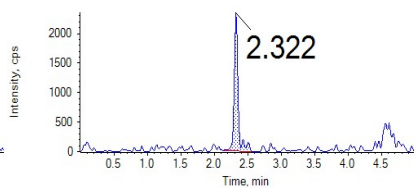

Beta cypermethrin

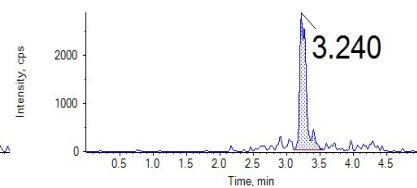

Chlorpyrifos

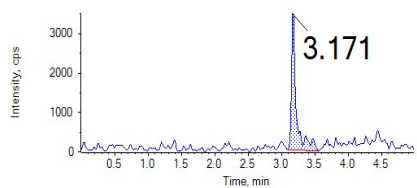

Chlorantranilipr

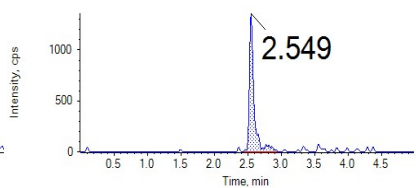

Cyantranilipr

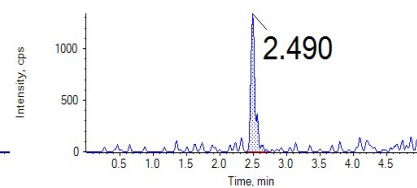

Thiamethoxam

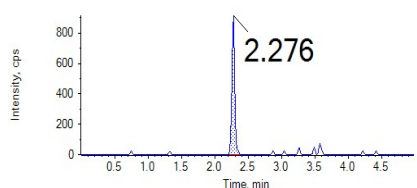

Carbaryl

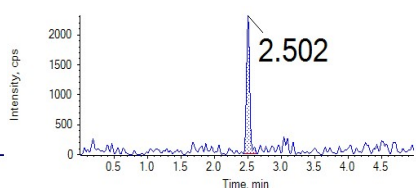

Emamectin benzoate

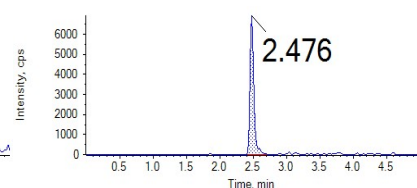

Indoxacarb

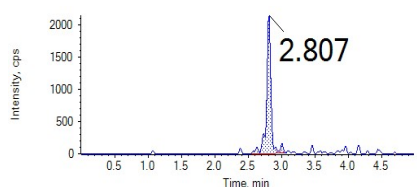

Acetamipri

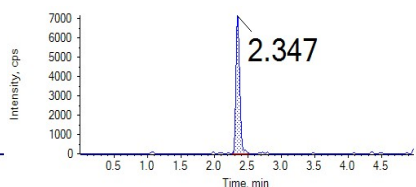

Lufenuron

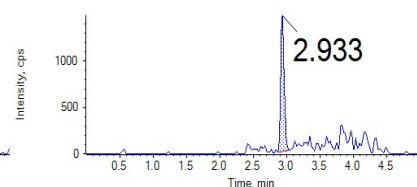

Dinotefuran

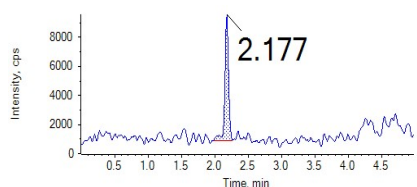

Tebuconazole

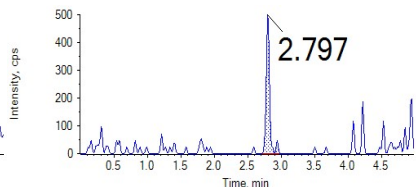

Azoxystrobin

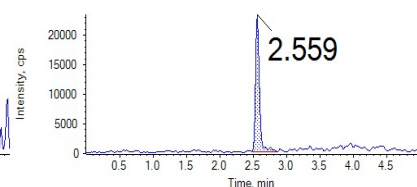

Propiconazole

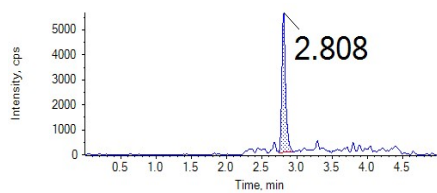

Triadimefon

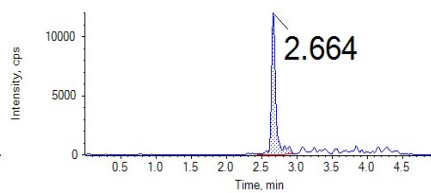

Trifloxystrobin

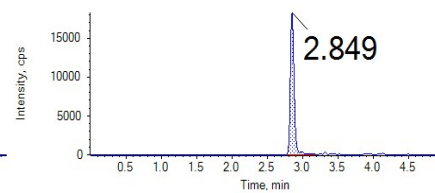

Epoxiconazole

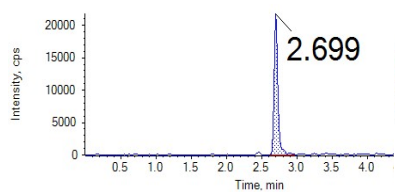

Pyraclostrobin

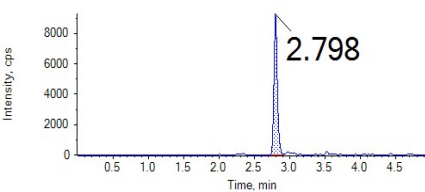

Difenoconazole

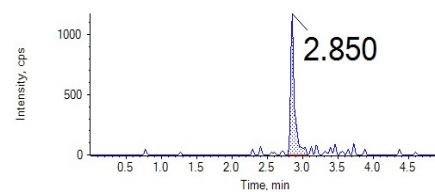

Metalaxyl-m

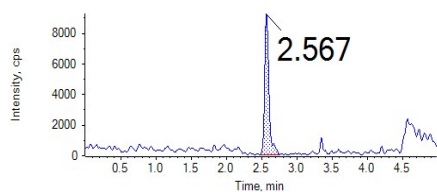

Carbendazim

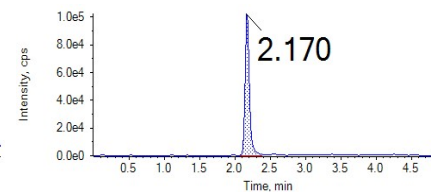

Atrazine

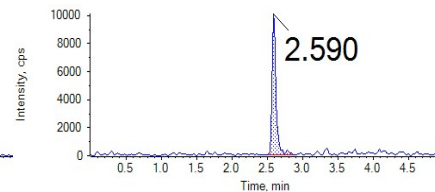

Acetochlor

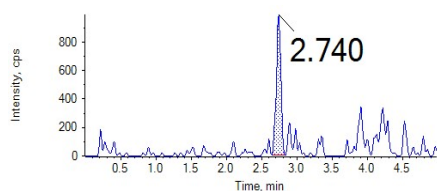

Clothianidin

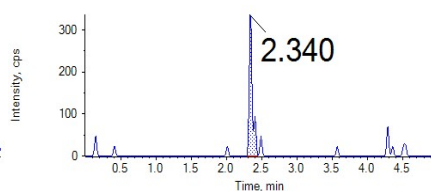

Fludioxonil

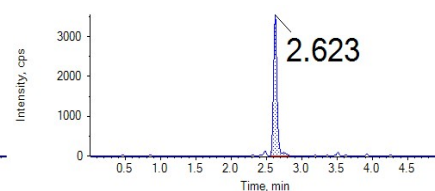

Fig. S1 MS chromatogram of 27 standard pesticides at low levels.
